# Supplementary material for: Population Genomic Analysis of Ancient and Modern Genomes Yields New Insights into the Genetic Ancestry of the Tyrolean Iceman and the Genetic Structure of Europe
Source: PLoS Genet. 2014 May 8;10(5):e1004353. doi: 10.1371/journal.pgen.1004353 (PMC4014435; doi:10.1371/journal.pgen.1004353)
Supplement: Table S1 — D-Tests of Iceman – 1000G/Sardinia with outgroup. (XLSX) [file pgen.1004353.s011.xlsx]

## Sheet: Sheet1
Table S1. D-Tests of Iceman – 1000G/Sardinia with outgroup
Population 1*	Population 2*	D	Z
Sardinia	TSI	-0.016	-16.68
Sardinia	IBS	-0.016	-9.82
Sardinia	CEU	-0.017	-14.19
Sardinia	GBR	-0.018	-14.06
Sardinia	FIN	-0.028	-17.53
TSI	FIN	-0.013	-9.08
IBS	FIN	-0.012	-6.14
CEU	FIN	-0.011	-9.76
GBR	FIN	-0.011	-9.2
TSI	IBS	-0.001	-0.51
TSI	CEU	-0.002	-1.75
TSI	GBR	-0.002	-1.91
IBS	CEU	-0.001	-0.59
IBS	GBR	-0.001	-0.68
CEU	GBR	0	-0.17
* Test of the configuration D(O, Iceman; Population 1, Population 2)
